# Supplementary material
Source: PubMed Central journal article supplement (PMC7021713)

# Fig. S1

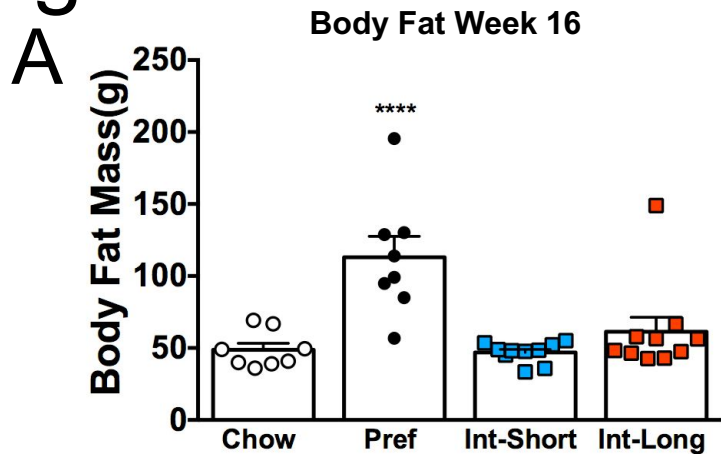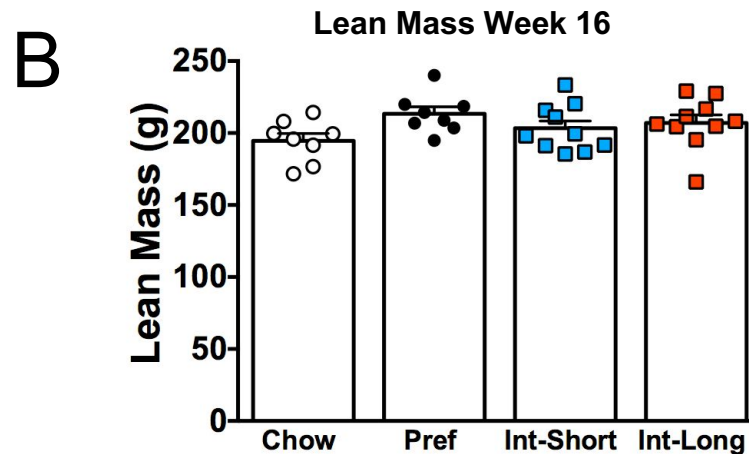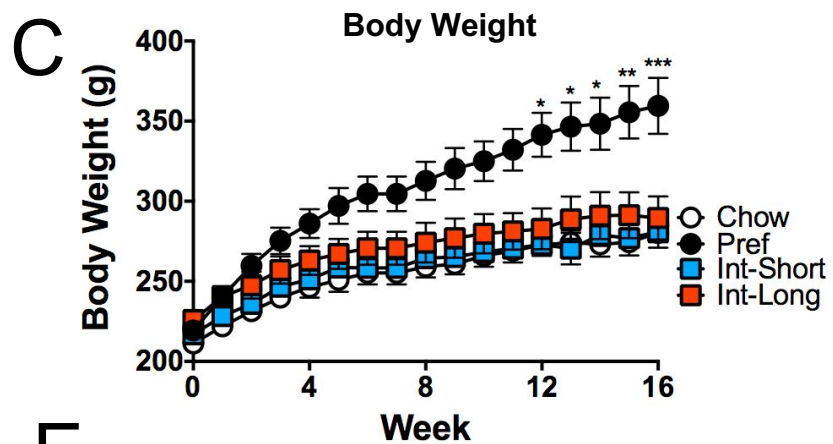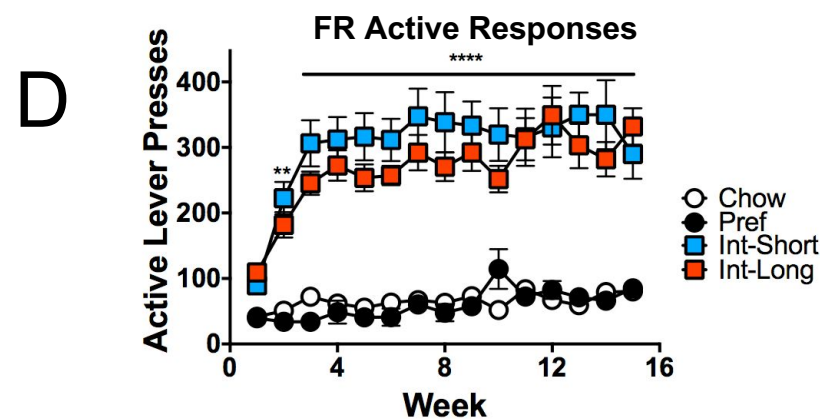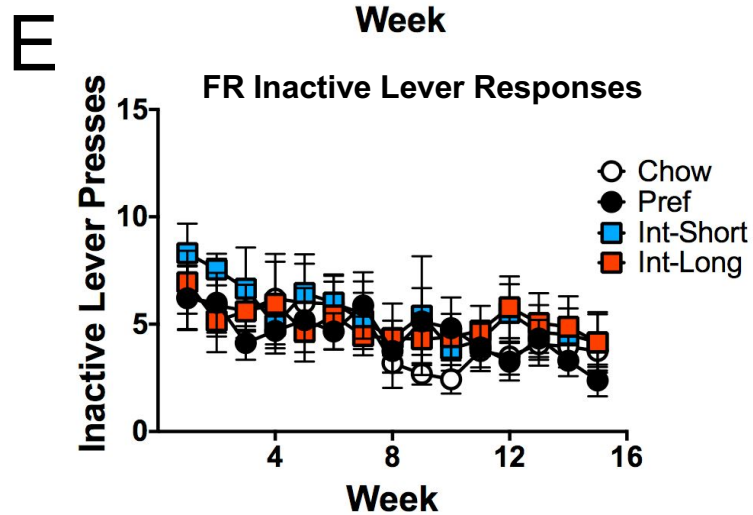

Supplement: 41386_2019_538_MOESM2_ESM.pdf [file 41386_2019_538_MOESM2_ESM.pdf]

# Fig. S2

A

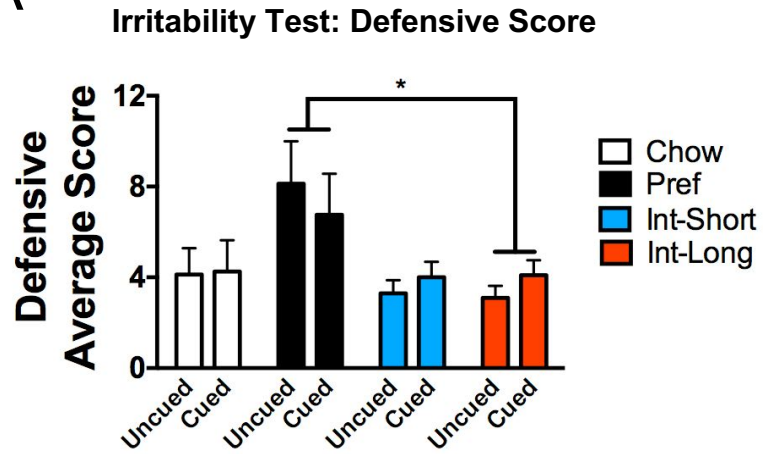

B

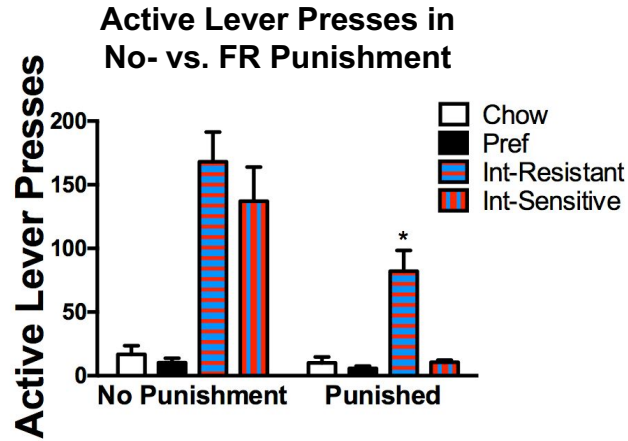

C

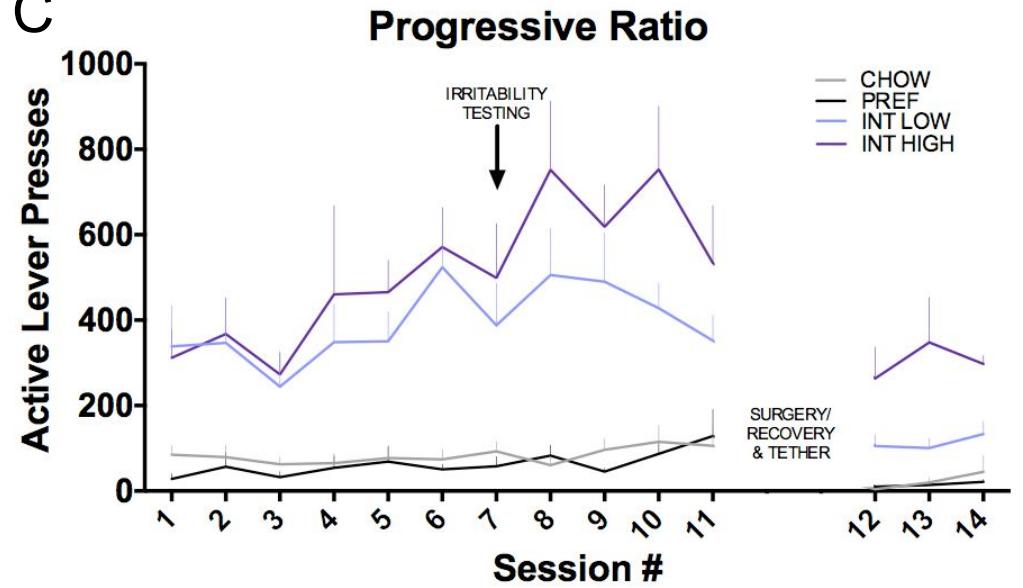

D

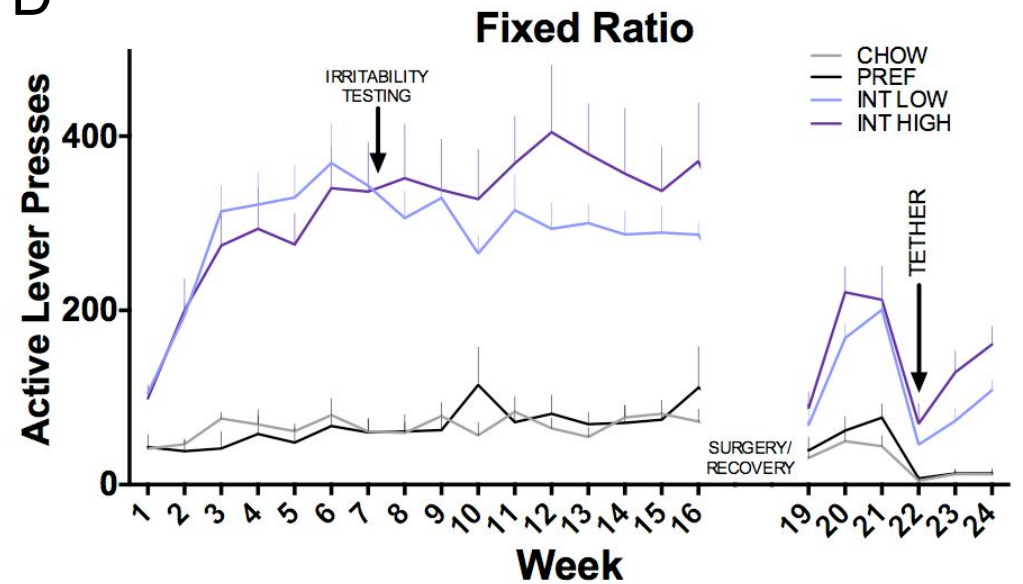

Supplement: 41386_2019_538_MOESM3_ESM.pdf [file 41386_2019_538_MOESM3_ESM.pdf]

# Fig S3

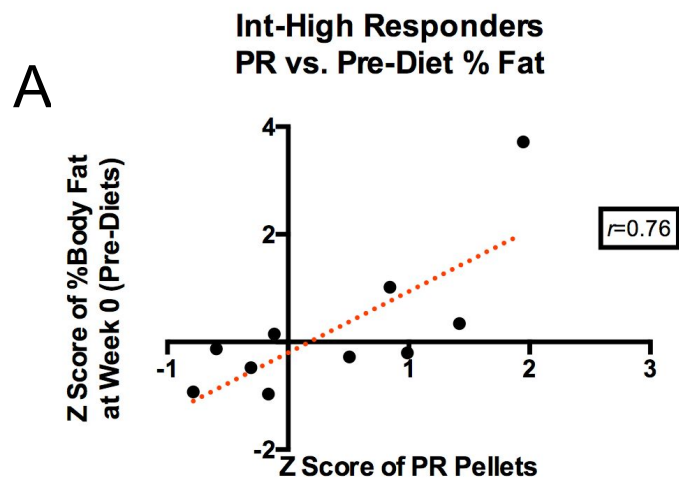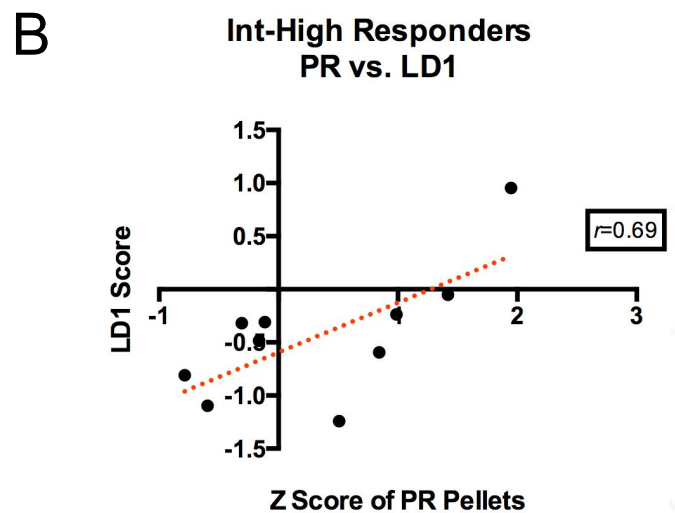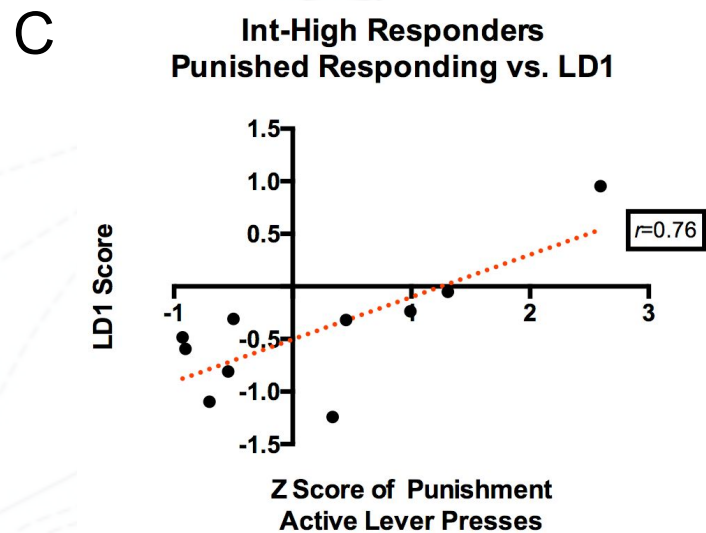

Supplement: 41386_2019_538_MOESM4_ESM.pdf [file 41386_2019_538_MOESM4_ESM.pdf]

# Fig S4

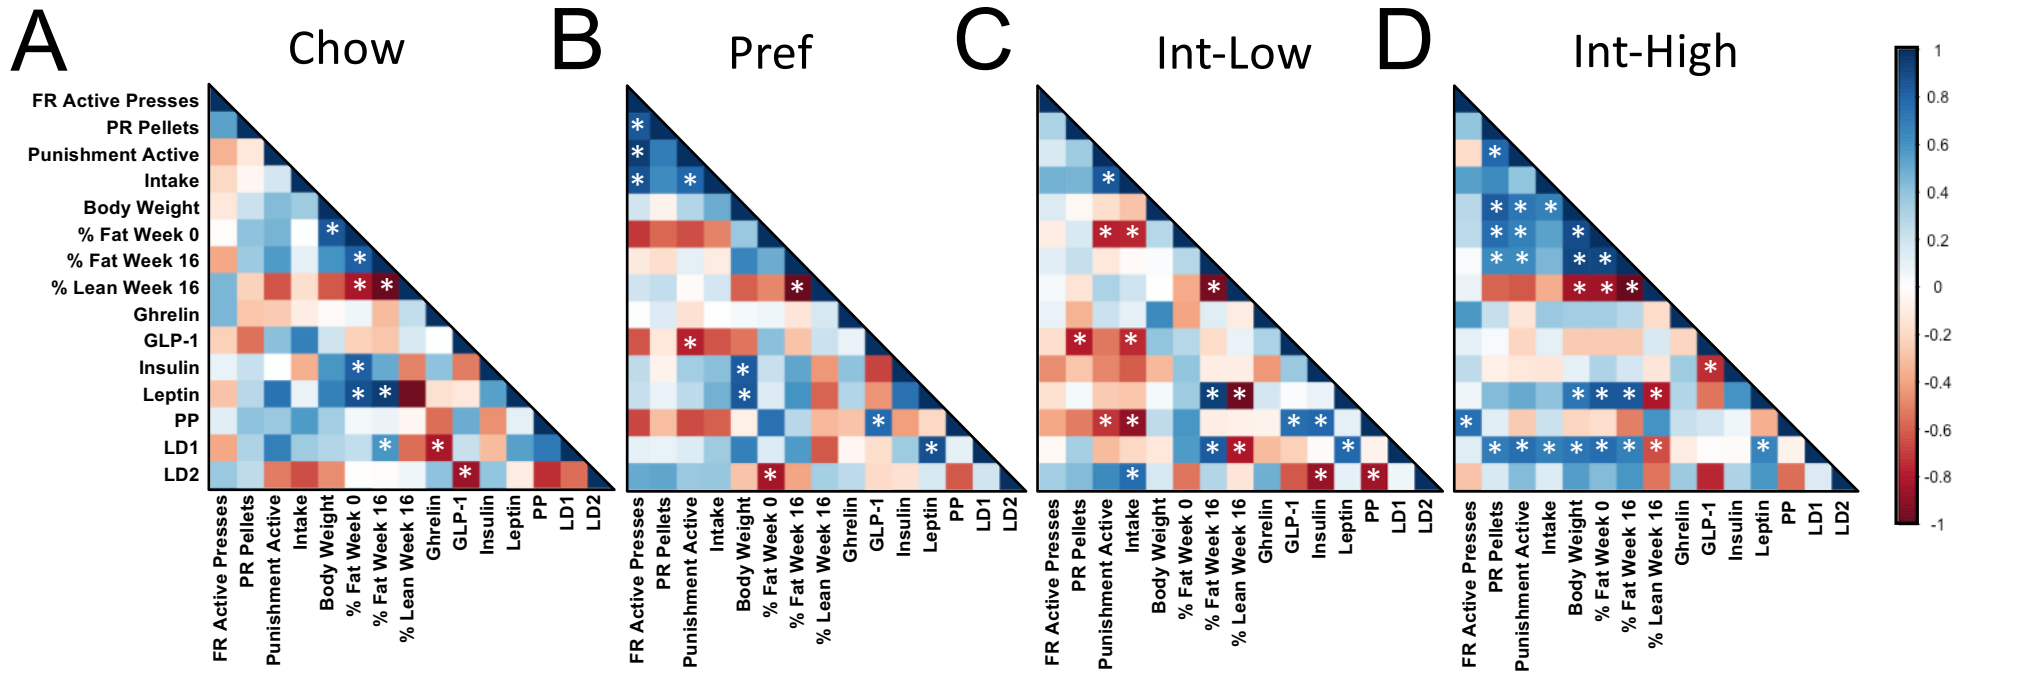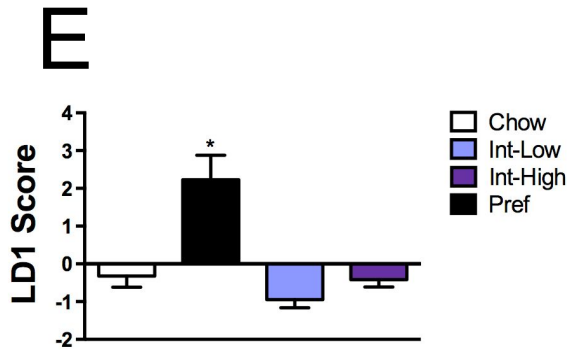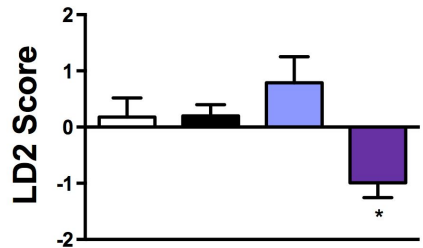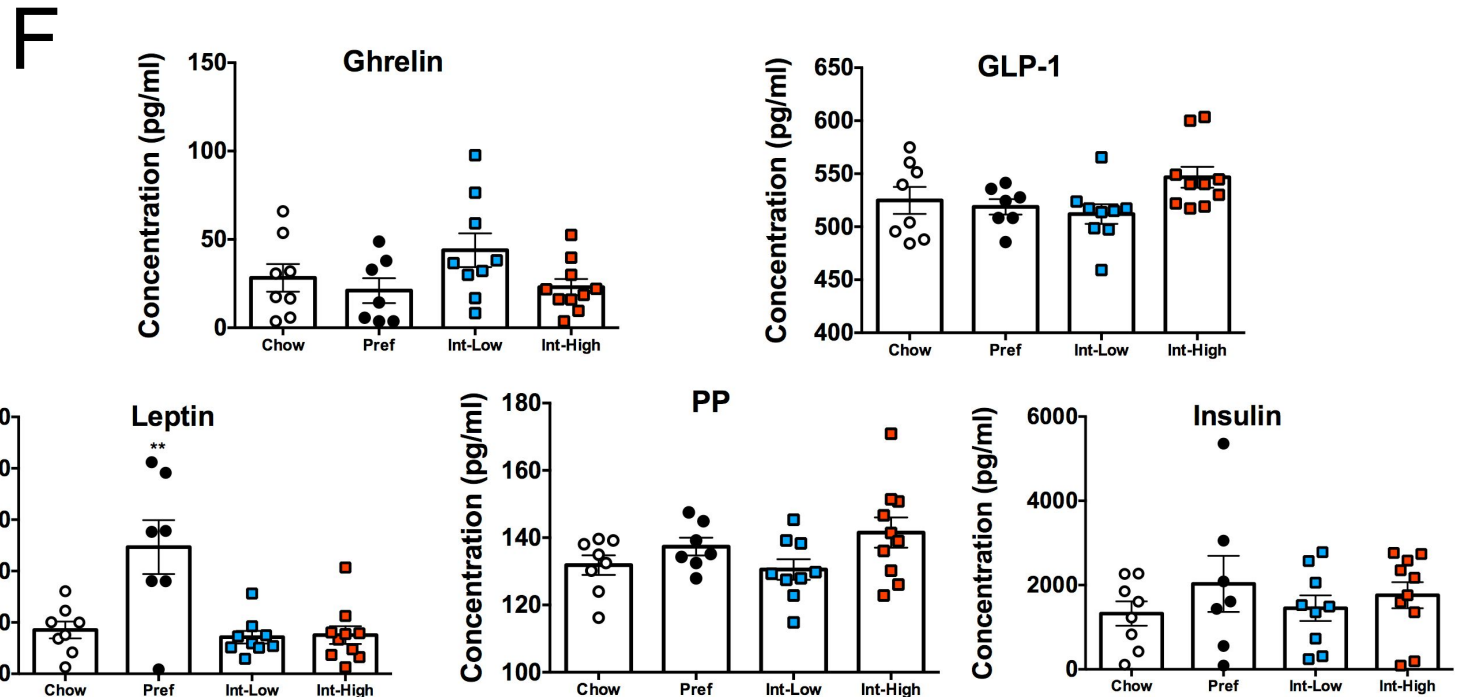

Supplement: 41386_2019_538_MOESM5_ESM.pdf [file 41386_2019_538_MOESM5_ESM.pdf]

# Fig S5

## A

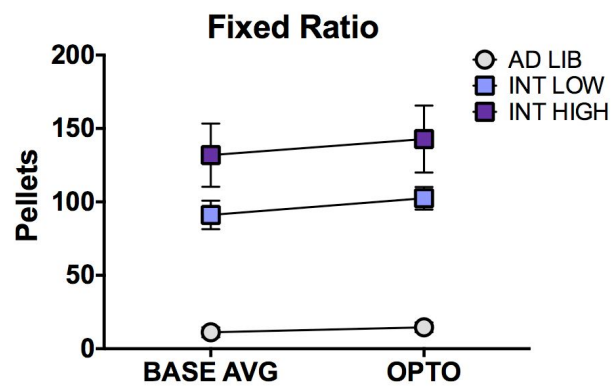

## B

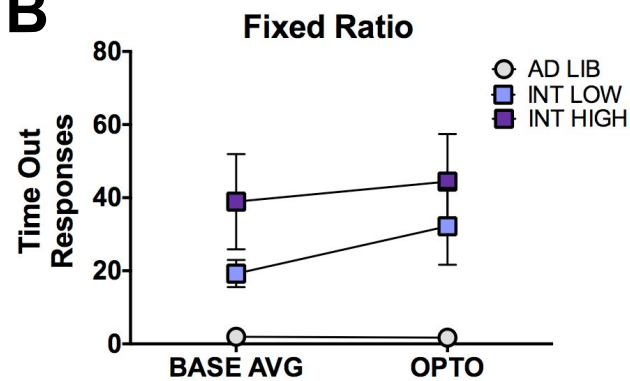

## C

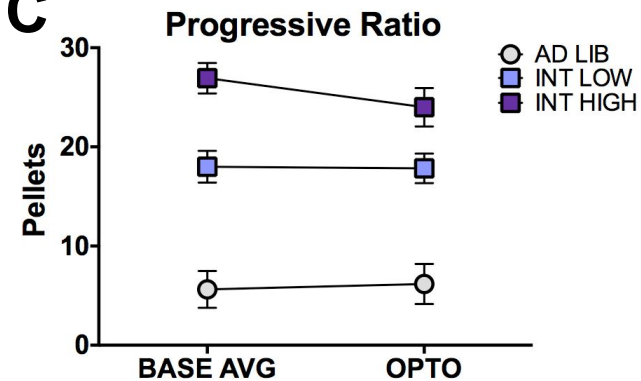

## D

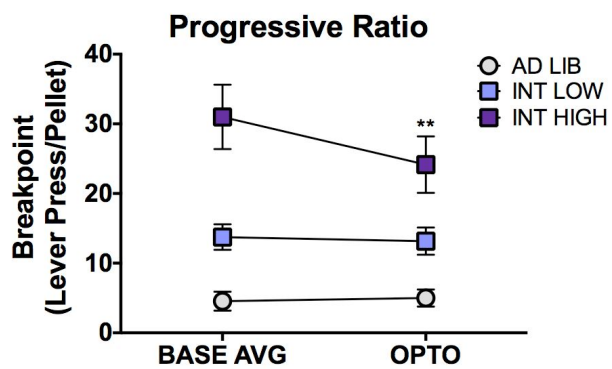

## E

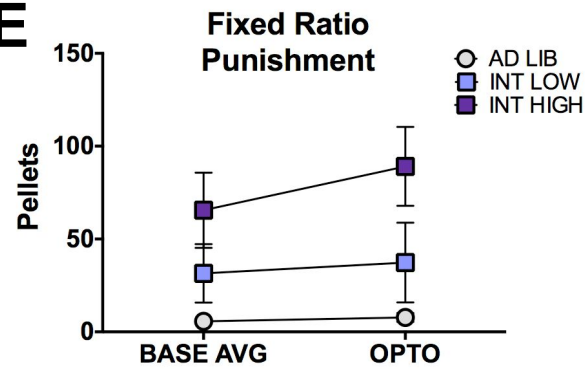

## F

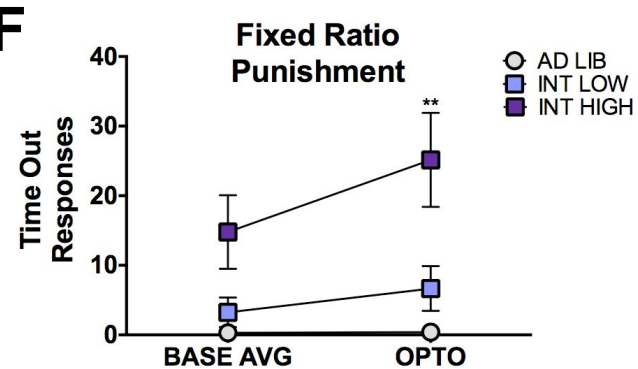

## G

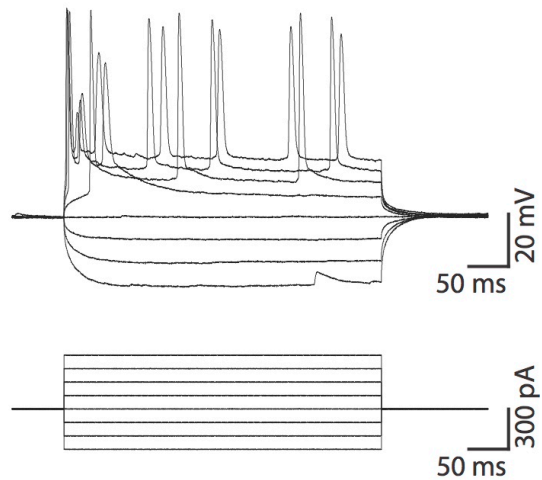

## H

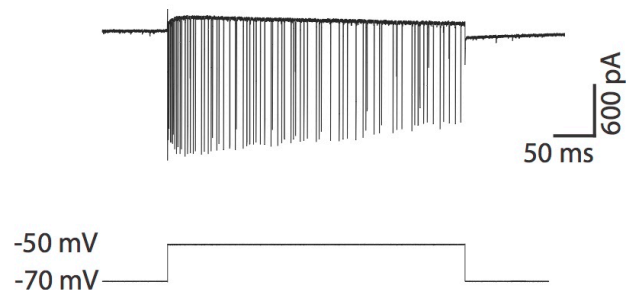

Supplement: 41386_2019_538_MOESM6_ESM.pdf [file 41386_2019_538_MOESM6_ESM.pdf]

# Fig S6

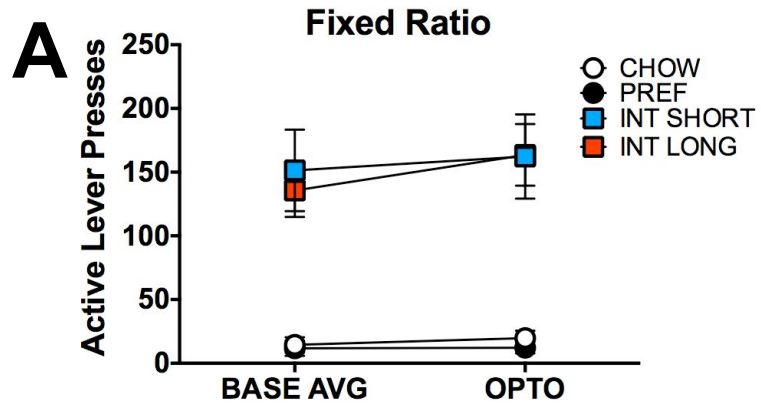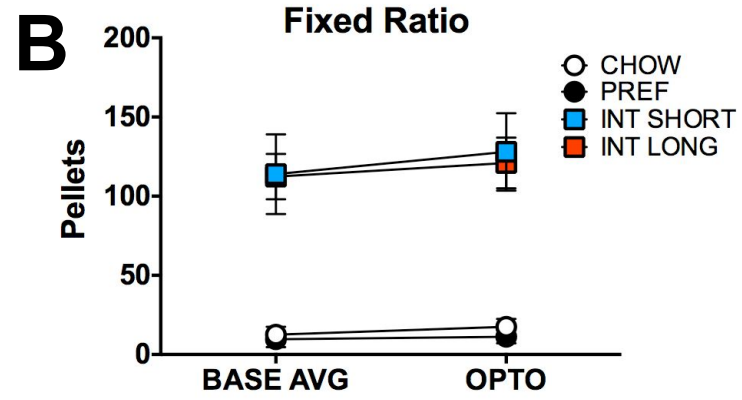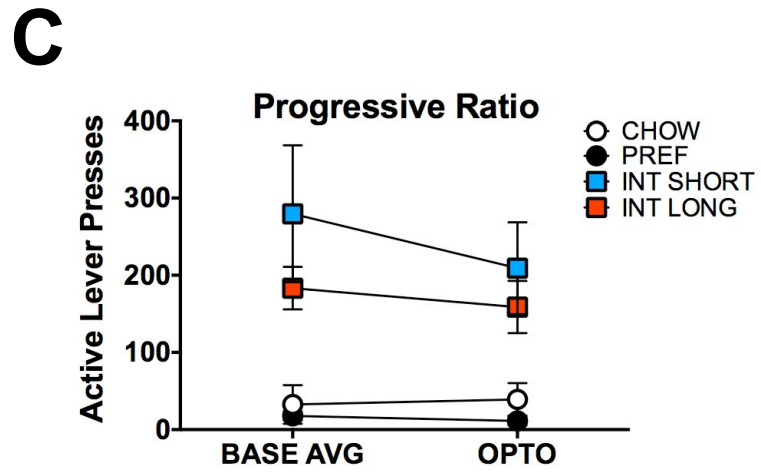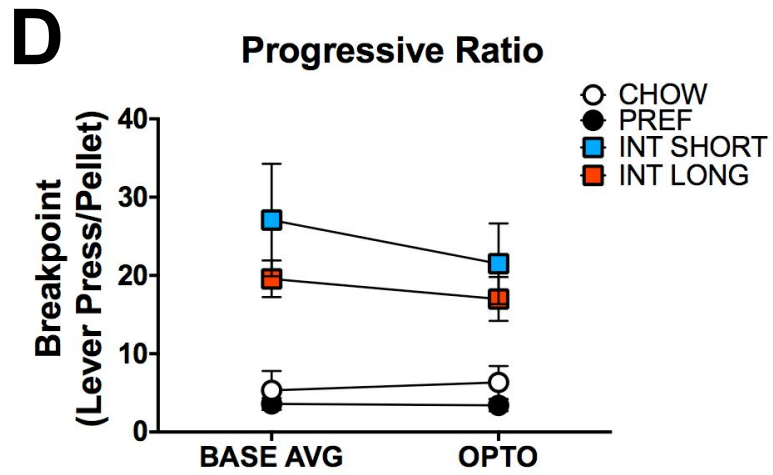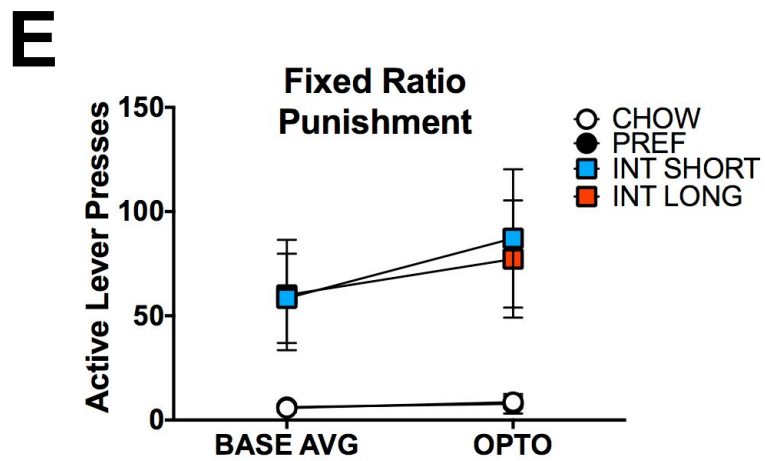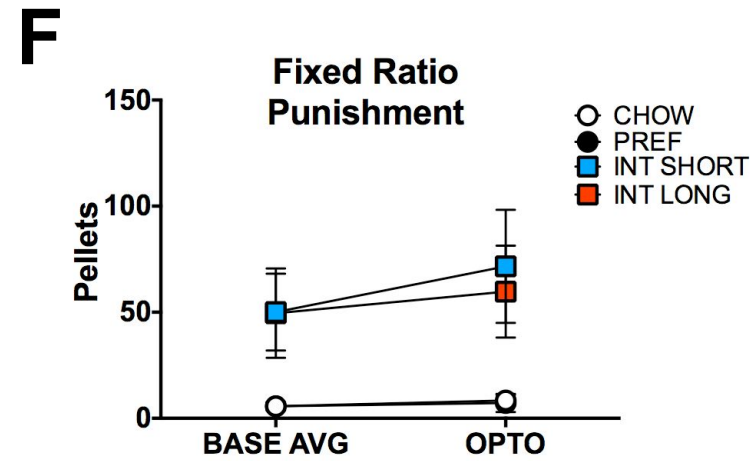

Supplement: 41386_2019_538_MOESM7_ESM.pdf [file 41386_2019_538_MOESM7_ESM.pdf]

# Fig S7

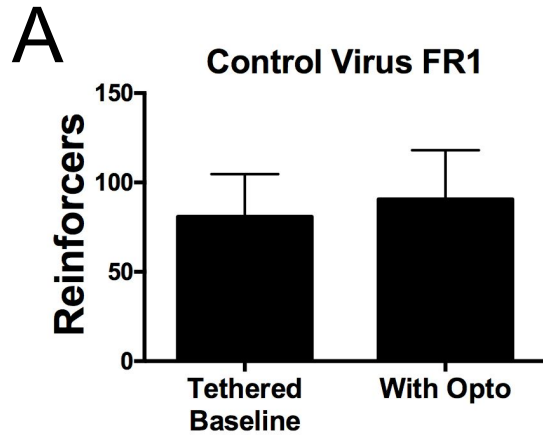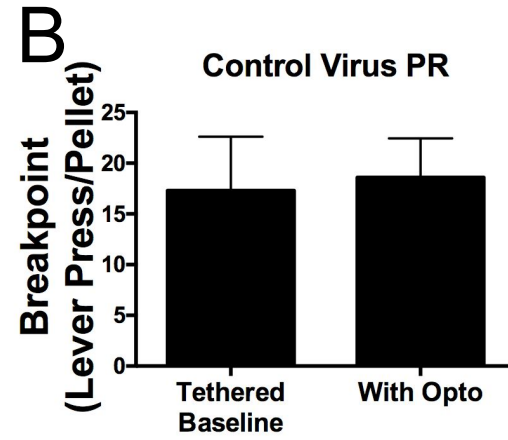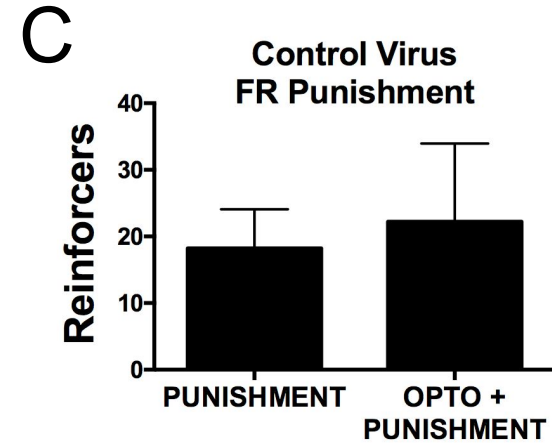

Supplement: 41386_2019_538_MOESM8_ESM.pdf [file 41386_2019_538_MOESM8_ESM.pdf]
